# Supplementary material for: Self-assembled antibacterial coating by N-halamine polyelectrolytes on a cellulose substrate
Source: Royal Society of Chemistry journal article supplement (doi:10.1039/c4tb01699h), 2015-01-01
Supplement: c4tb01699h1.pdf [file c4tb01699h1.pdf]

## Self-assembled antibacterial coating by N-halamine polyelectrolytes on cellulose substrate

Ying Liu<sup>a</sup>, Jing Li<sup>a</sup>, Xiaoli Cheng<sup>a</sup>, Xuehong Ren<sup>\*a</sup> and T.S. Huang<sup>b</sup>

<sup>a</sup> Key Laboratory of Eco-textiles of Ministry of Education, College of Textiles and Clothing, Jiangnan University, Wuxi 214122, Jiangsu, China

<sup>b</sup> Department of Poultry Science, Auburn University, Auburn, AL 36849, USA

\*Corresponding author: Tel: +86-051085912007; Fax: +86-051085912009;

E-mail: xhren@jiangnan.edu.cn (Xuehong Ren)

### SUPPORTING INFORMATION

**Table S1** Chemical composition of artificial sweat

| Chemical Compositon                                                                                                                    | Concentration (%(w/v)) |               |               |              |
|----------------------------------------------------------------------------------------------------------------------------------------|------------------------|---------------|---------------|--------------|
|                                                                                                                                        | AATCC pH<br>4.3        | ISO pH<br>5.5 | ISO pH<br>8.0 | EN pH<br>6.5 |
| L-histidine monohydrochloride<br>monohydrate<br>(C <sub>6</sub> H <sub>9</sub> O <sub>2</sub> N <sub>3</sub> • HCl • H <sub>2</sub> O) | 0.025                  | 0.05          | 0.05          | -            |
| Sodium chloride (NaCl)                                                                                                                 | 1.00                   | 0.50          | 0.50          | 1.08         |
| Disodium hydrogen<br>orthophosphate dodecahydrate<br>(Na <sub>2</sub> HPO <sub>4</sub> • 12H <sub>2</sub> O)                           | -                      | -             | 0.50          | -            |
| Sodium dihydrogen<br>orthophosphate dihydrate<br>(NaH <sub>2</sub> PO <sub>4</sub> • 2H <sub>2</sub> O)                                | -                      | 0.22          | -             | -            |
| Disodium hydrogen<br>orthophosphate anhydrous<br>(Na <sub>2</sub> HPO <sub>4</sub> )                                                   | 0.10                   | -             | -             | -            |
| Lactic acid (88%)                                                                                                                      | 0.097                  | -             | -             | 0.12         |
| Urea                                                                                                                                   | -                      | -             | -             | 0.13         |

**Table S2** Evaluation criteria of scores for erythema and edema

| Stimulus response                                         | scores |
|-----------------------------------------------------------|--------|
| Erythema                                                  |        |
| No                                                        | 0      |
| Slight erythema (narrowly seen)                           | 1      |
| Moderate erythema (obviously seen)                        | 2      |
| Severe erythema                                           | 3      |
| Fuchsia erythema with slight eschar                       | 4      |
| Edema                                                     |        |
| No (narrowly seen)                                        | 0      |
| Moderate edema (obvious eminence)                         | 1      |
| Severe edema (eminence in 1 mm with obvious outline)      | 2      |
| Serious edema (eminence in more than 1 mm with expansion) | 3      |
| Highest score                                             | 4      |

**Table S3** Evaluation criteria of stimulus intensity

| Score    | Grade                |
|----------|----------------------|
| 0-0.49   | No stimulation       |
| 0.5-2.99 | Slight stimulation   |
| 3.0-5.99 | Moderate stimulation |
| 6.0-8.0  | Serious stimulation  |
